# Supplementary material for: The Role of the Unbinding Cycle on the Coordination Abilities of the Bi-Cyclopeptides toward Cu(II) Ions
Source: MDPI journal article supplement (doi:10.3390/molecules29102197), 2024-05-08
Supplement: s1 [file s1]

## SUPPLEMENTARY MATERIALS

### The role of the unbinding cycle on the coordination abilities of the bi-cyclopeptides toward Cu(II) ions

Alicja Lisowska<sup>1</sup>, Paulina Świątek<sup>2</sup>, Filip Dębicki<sup>3</sup>, Agnieszka Lewińska<sup>4</sup>, Aleksandra Marciniak<sup>5</sup>, Lorenzo Pacini<sup>6,7</sup>, Anna Maria Papini<sup>6,7\*</sup>, Justyna Brasun<sup>5\*</sup>.

<sup>1</sup> Biomolecule Student Science Club, Faculty of Pharmacy, Wrocław Medical University, 50-556 Wrocław, Poland

<sup>2</sup> Graduate of Faculty of Pharmacy, Wrocław Medical University, 50-556 Wrocław, Poland

<sup>3</sup> Faculty of Medicine, Medical University of Łódź, 90-647 Łódź, Poland

<sup>4</sup> Faculty of Chemistry, Wrocław University, 50-137 Wrocław, Poland

<sup>5</sup> Department of the Basic Chemical Sciences, Wrocław Medical University, 50-556 Wrocław, Poland

<sup>6</sup> Interdepartmental Research Unit of Peptide and Protein Chemistry and Biology, University of Florence, 50019 Sesto Fiorentino (FI), Italy

<sup>7</sup> Department of Chemistry "Ugo Schiff", University of Florence, 50019 Sesto Fiorentino (FI), Italy

\* Correspondence: AMP: [annamaria.papini@unifi.it](mailto:annamaria.papini@unifi.it) and JB: [justyna.brasun@umw.edu.pl](mailto:justyna.brasun@umw.edu.pl)

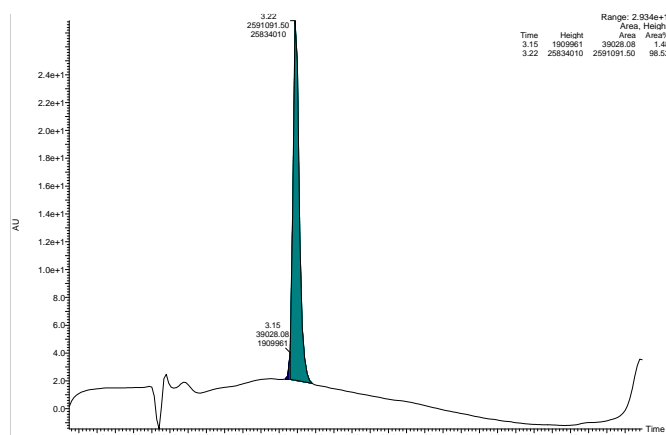

**Figure S1:** RP-UHPLC trace of **LNL** registered on Thermo Scientific Ultimate 3000 with a diode array detector coupled with a Thermo Scientific MSQ PLUS ESI mass spectrometer.  $R_t$  3.22: LNL. RP-UHPLC-ESI-MS: C18 column Waters Acquity CSH™ (130 Å, 1.7 µm, 2.1 × 100 mm); temperature 45 °C; flow: 0.5 mL/min; eluent: 0.1% (v/v) TFA in H<sub>2</sub>O (A) and 0.1% (v/v) TFA in CH<sub>3</sub>CN (B), λ 215 nm, gradient: 25–60% B in 5 min.

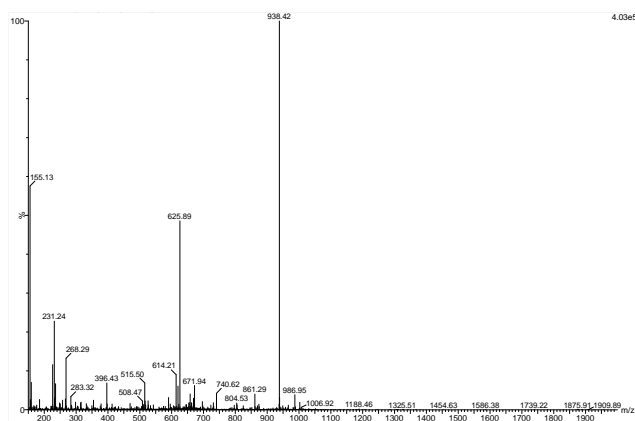

**Figure S2:** ESI-MS spectrum of **LNL** registered on a Thermo Scientific MSQ PLUS ESI mass spectrometer. ESI-MS (m/z):  $[M+2H]^{2+}$  calcd. 938.12;  $[M+2H]^{2+}$  found 938.42.

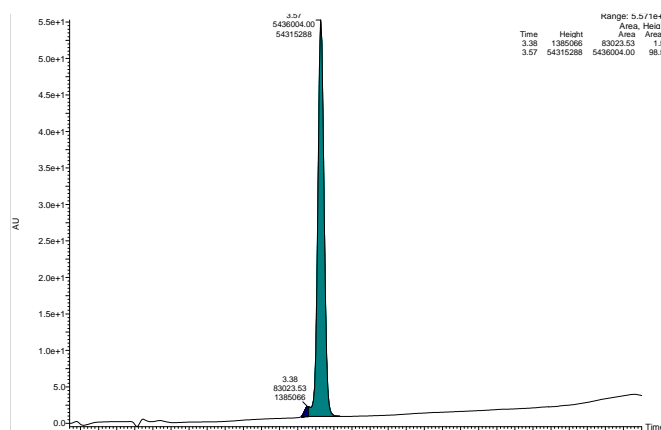

**Figure S3:** RP-UHPLC trace of **MCL2** registered on Thermo Scientific Ultimate 3000 with a diode array detector coupled with a Thermo Scientific MSQ PLUS ESI mass spectrometer.  $R_t$  3.57: MCL2. RP-UHPLC-ESI-MS: C18 column Waters Acquity CSH™ (130 Å, 1.7 µm, 2.1 × 100 mm); temperature 45 °C; flow: 0.5 mL/min; eluent: 0.1% (v/v) TFA in H<sub>2</sub>O (A) and 0.1% (v/v) TFA in CH<sub>3</sub>CN (B), λ 215 nm, gradient: 25–60% B in 5 min.

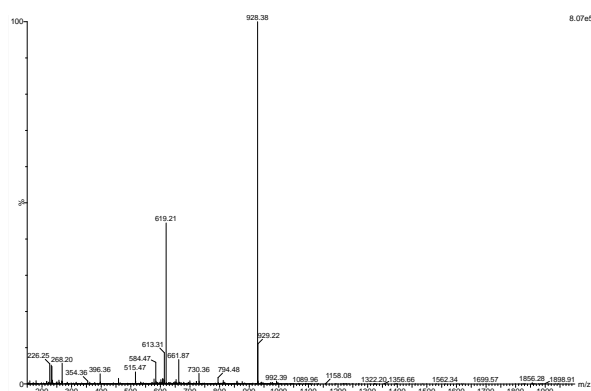

**Figure S4:** ESI-MS spectrum of **MCL2** registered on a Thermo Scientific MSQ PLUS ESI mass spectrometer. ESI-MS (m/z):  $[M+2H]^{2+}$  calcd. 928.14;  $[M+2H]^{2+}$  found 928.38.

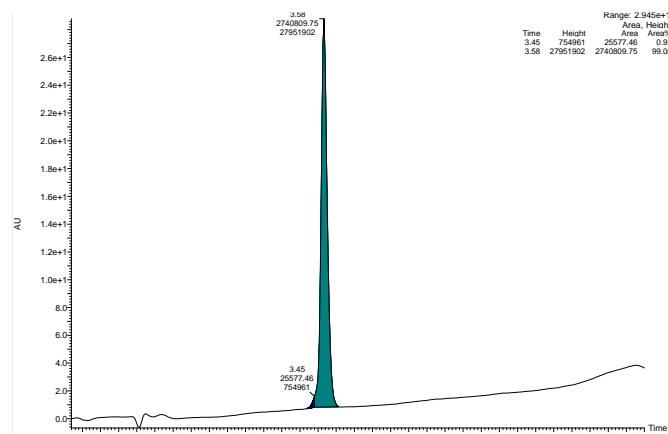

**Figure S5:** RP-UHPLC trace of **MCL3** registered on Thermo Scientific Ultimate 3000 with a diode array detector coupled with a Thermo Scientific MSQ PLUS ESI mass spectrometer.  $R_t$  3.58: MCL3. RP-UHPLC-ESI-MS: C18 column Waters Acquity CSH™ (130 Å, 1.7 µm, 2.1 × 100 mm); temperature 45 °C; flow: 0.5 mL/min; eluent: 0.1% (v/v) TFA in H<sub>2</sub>O (A) and 0.1% (v/v) TFA in CH<sub>3</sub>CN (B), λ 215 nm, gradient: 25–60% B in 5min.

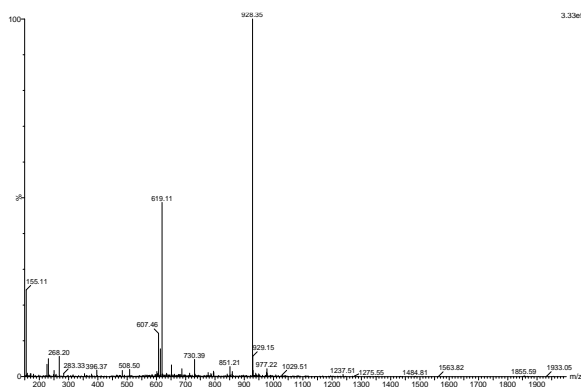

**Figure S6:** ESI-MS spectrum of **MCL3** registered on a Thermo Scientific MSQ PLUS ESI mass spectrometer. ESI-MS (m/z): [M+2H]<sup>2+</sup> calcd. 928.14; [M+2H]<sup>2+</sup> found 928.35.
